# Supplementary material
Source: publisher figshare collection journal article supplement (https://acs.figshare.com/ndownloader/files/24487376)
Supplement: Supplementary file 1 [file 24487376]

## Supporting Information

# **Dissolvable Microneedles Coupled with Nanofiber Dressings Eradicate Biofilms *via* Effectively Delivering a Database Designed Antimicrobial Peptide**

Yajuan Su<sup>†</sup>, Valerio Luca Mainardi<sup>#</sup>, Hongjun Wang<sup>†</sup>, Alec McCarthy<sup>†</sup>, Yu Shrike Zhang<sup>#</sup>, Shixuan Chen<sup>†</sup>, Johnson V. John<sup>†</sup>, Shannon L. Wong<sup>‡</sup>, Ronald R. Hollins<sup>‡</sup>, Guangshun Wang<sup>§,\*</sup>, and Jingwei Xie<sup>†,\*</sup>

*<sup>†</sup>Department of Surgery-Transplant and Mary & Dick Holland Regenerative Medicine Program, University of Nebraska Medical Center, Omaha, Nebraska 68130, United States*

*<sup>#</sup>Division of Engineering in Medicine, Department of Medicine, Brigham and Women's Hospital, Harvard Medical School, Cambridge, MA 02139, United States*

*<sup>‡</sup>Department of Surgery-Plastic Surgery, University of Nebraska Medical Center, Omaha, Nebraska 68130, United States*

*<sup>§</sup>Department of Pathology and Microbiology, College of Medicine, University of Nebraska Medical Center, University of Nebraska Medical Center, Omaha, Nebraska 68198, United States*

To whom the correspondence should be addressed.

\*E-mail: [jingwei.xie@unmc.edu](mailto:jingwei.xie@unmc.edu) (J. Xie) and [gwang@unmc.edu](mailto:gwang@unmc.edu) (G. Wang)

Phone: +1 (402) 5599442

Fax: +1(402) 5597521

## **METHODS**

**Microneedle Dissolution.** The microneedle dissolution was evaluated in the biofilm created on human skin wounds *ex vivo*. A Janus-type dressing was first inserted into the biofilm by applying manual pressure. The dressing was removed each 1 min for observation and evaluation till the microneedle arrays were completely dissolved.

**FITC-dextran Distribution in Biofilm after Administration of FITC-dextran-incorporated Microneedle Arrays.** The FITC-dextran (Mw=4,000, Sigma-Aldrich, St. Louis, MO, USA) with the same concentration and similar molecular weight as W379 peptides was first incorporated to the PVP microneedle array. The FITC-dextran distribution was viewed *in situ* after administration of the microneedle array to the biofilm created on human skin wounds *ex vivo* using a Zeiss 880 laser scanning confocal microscope (CLSM) under the multi slice mode.

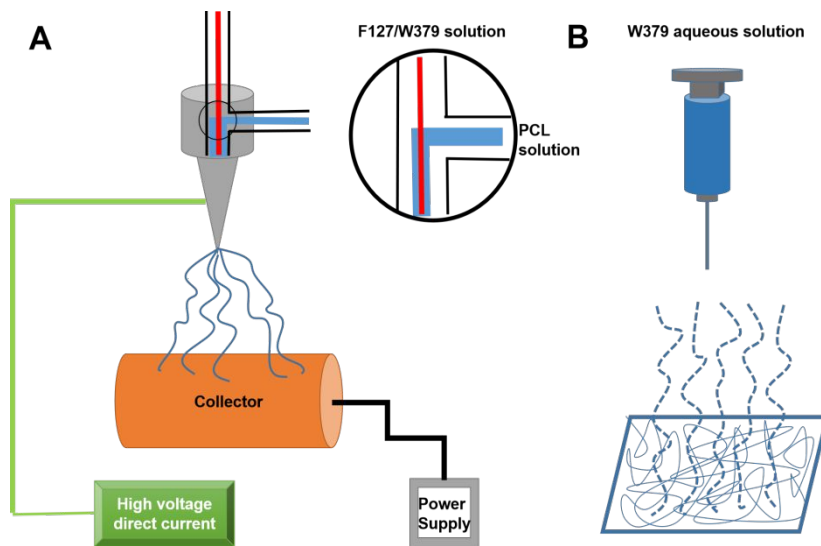

**Figure S1.** (A) Schematic illustrating co-axial electrospinning and preparation of pluronic F127/W379-PCL nanofiber dressings. (B) Schematic illustrating electrospray deposition of engineered peptide W379 to pluronic F127/W379-PCL nanofiber membranes to form pluronic F127/W379-PCL-S nanofiber dressings.

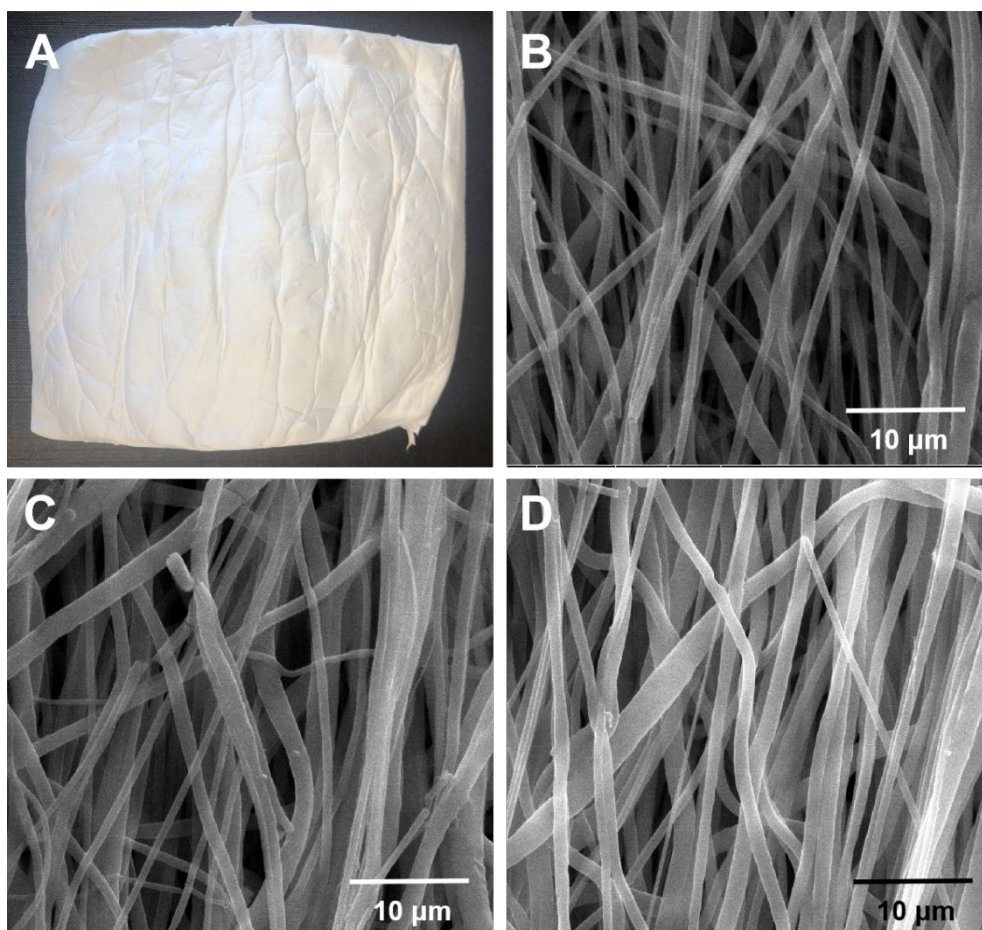

**Figure S2.** Morphology of nanofiber dressings. (A) Photograph of pluronic F127/W379-PCL core-shell nanofiber membranes. (B–D) SEM images of pluronic F127-PCL core-shell nanofibers, pluronic F127/W379-PCL core-shell nanofibers, and pluronic F127/W379-PCL-S nanofibers.

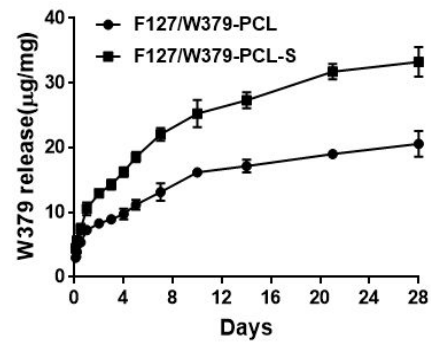

**Figure S3.** *In vitro* release profiles of the W379 peptide from F127/W379-PCL core-shell nanofibers and after electrospray deposition of W379 (F127/W379-PCL-S).

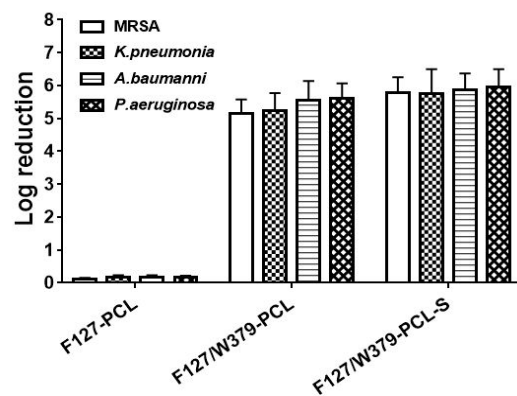

**Figure S4.** *In vitro* antibacterial efficacy test of F127/W379-PCL core-shell nanofibers. The bacterial solution was diluted into  $1.0 \times 10^7$  CFU/mL in PBS. One milligram of PCL or F127/W379- PCL core-shell nanofiber membranes was co-incubated with the bacterial solution for 2 h at 37 °C. Total remaining bacteria were determined by culturing on agar plates.

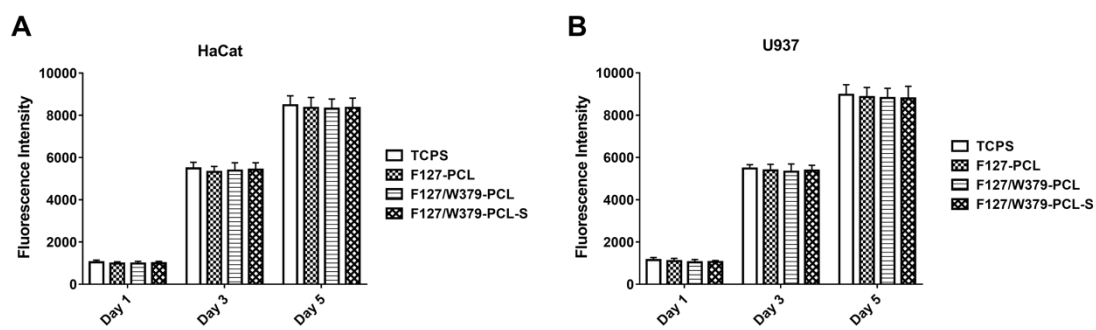

**Figure S5.** *In vitro* cytotoxicity test of W379 peptide-loaded PCL nanofiber membranes. (A) Alamar Blue cell viability test against HaCaT cells. (B) Alamar blue cell viability test against U937 cells. Each data point represents arithmetic mean  $\pm$  SD values from four samples.

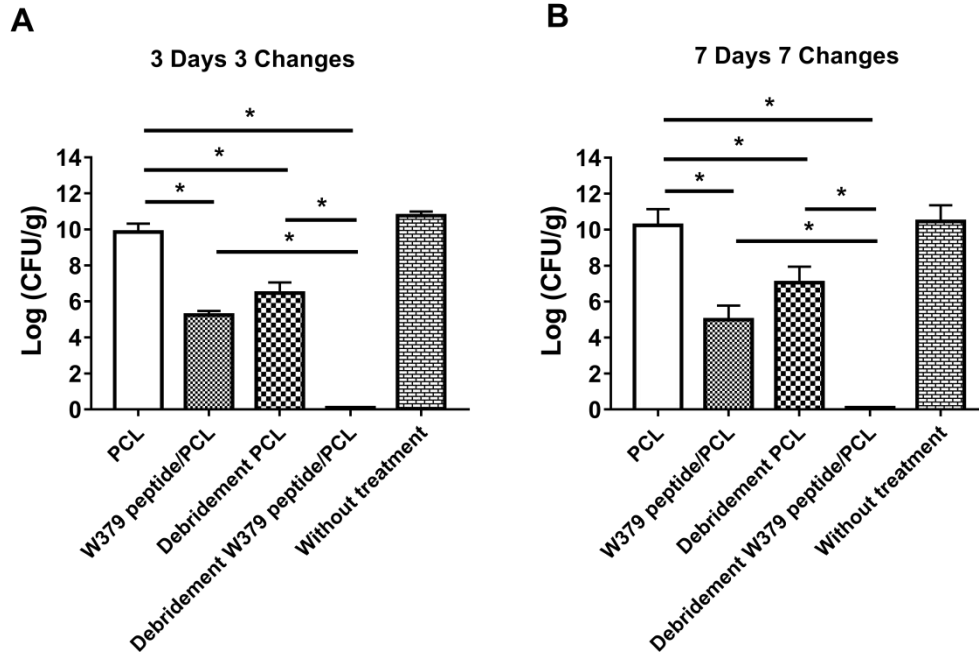

**Figure S6.** *In vivo* antibiofilm efficacy test of F127/W379-PCL-S nanofiber dressings. The MRSA and biofilm-containing chronic wounds created in type II diabetic mice were treated by F127/W379-PCL-S nanofiber dressings without and with debridement. PCL: Pluronic F127-PCL core-shell nanofiber membranes. W379 peptide/PCL: W379/pluronic F127-PCL core-shell nanofiber membranes. Debridement PCL: the wounds were conducted debridement and treated with pluronic F127-PCL core-shell nanofiber membranes. Debridement W379 peptide/PCL: the wounds were conducted debridement and treated with W379/pluronic F127-PCL core-shell nanofiber membranes. Without treatment: no treatment was applied to the wounds.



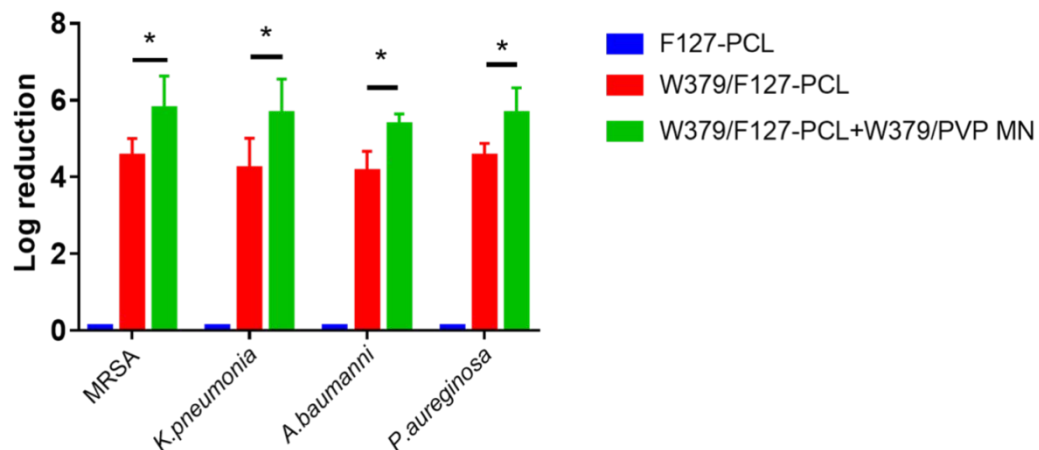

**Figure 7.** *In vitro* antibacterial activity. F127-PCL: Pluronic F127-PCL core-shell nanofiber membranes. W379/F127-PCL: W379/pluronic F127-PCL core-shell nanofiber membranes. W379/F127-PCL+W379/PVP MN: Janus-type antimicrobial dressing consisting of W379/pluronic F127-PCL core-shell nanofiber membranes and W379 loaded PVP microneedle arrays.

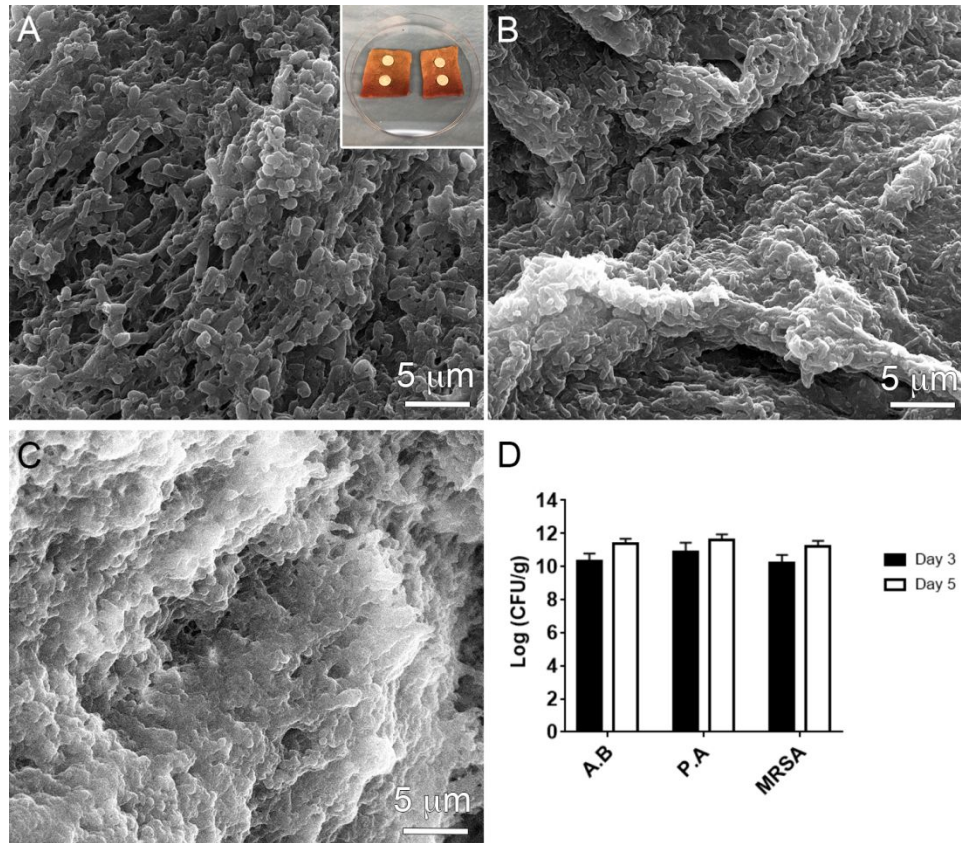

**Figure S8.** Biofilm formation on the excisional wounds created in human skin explants. (A-C) SEM images show the morphology of *A. baumannii*, *P. aeruginosa*, and MRSA biofilms on the excisional wounds in human skin explants. Inset: excisional wounds covered by Janus-type antimicrobial dressings (6 mm in diameter) in human skin explants. (D) Quantification of bacteria biofilms on excisional wounds in human skin explants.

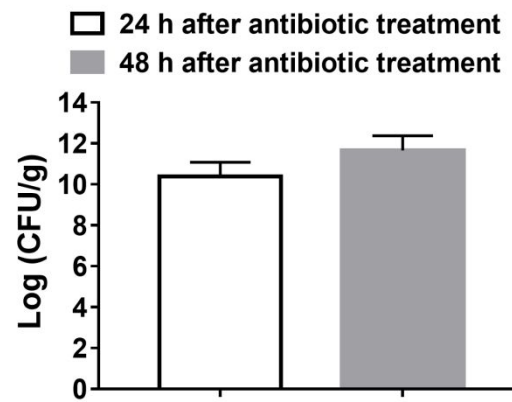

**Figure S9.** Quantification of bacterial load in the wound after 24 h and 48 h of MRSA inoculation and subsequent 24 h of 2% mupirocin treatment.

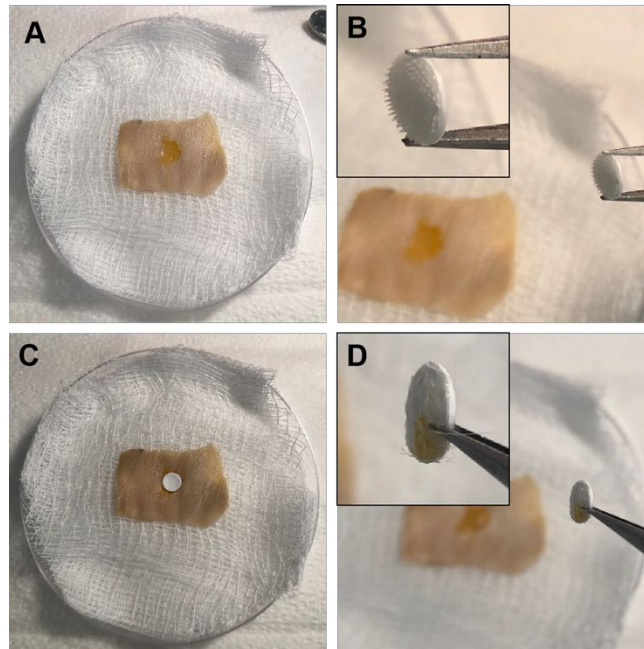

**Figure S10.** The dissolution of the microneedle arrays. (A) The biofilm was created on artificial wounds *ex vivo* before administration of dressings. (B) A Janus-type dressing consisting of a electrospun nanofiber membrane and an intact microneedle array. (C) The Janus-type dressing was administrated to the biofilm, and then the dressing was removed for observation with naked eyes. (D). After 3 min, the Janus-type dressing showed the electrospun nanofiber membrane alone, indicating the microneedle arrays were completely dissolved.

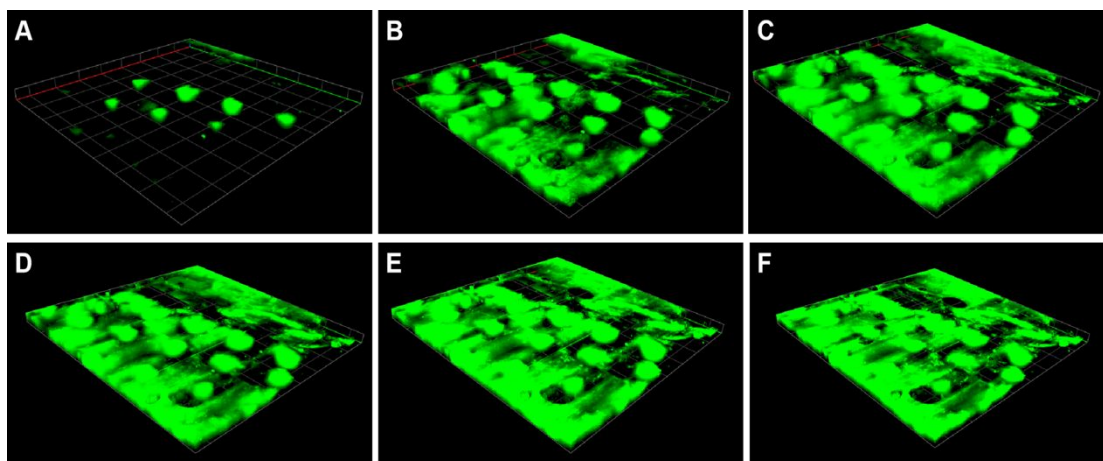

**Figure S11.** FITC-dextran diffusion and distribution in the biofilm created in human skin wounds *ex vivo* after administration of FITC-dextran containing microneedle arrays at different time points. (A) 0 min, (B) 20 min, (C) 40 min, (D) 60 min, (E) 80 min, (F) 100 min. The fluorescent region increased dramatically with increasing the administration time, revealing the FITC-dextran can effectively diffuse to the surrounding area in biofilms.

**Video S1.** Animations of the peptide diffusion in the biofilm layer over time for the control.  
 $D = 1 \times 10^{-12} m^2/s$  .

**Video S2.** Animations of the peptide diffusion in the biofilm layer over time for the microneedle patch.  $D = 1 \times 10^{-12} m^2/s$  and  $d = 150 \mu m$ .

**Video S3.** Animations of the peptide diffusion in the biofilm layer over time for the control.  
 $D = 1 \times 10^{-12} m^2/s$  .

**Video S4.** Animations of the peptide diffusion in the biofilm layer over time for the microneedle patch.  $D = 1 \times 10^{-12} m^2/s$  and  $d = 300 \mu m$ .

**Video S5.** Animations of the peptide diffusion in the biofilm layer over time for the control.  
 $D = 5 \times 10^{-13} m^2/s$  .

**Video S6.** Animations of the peptide diffusion in the biofilm layer over time for the microneedle patch.  $D = 5 \times 10^{-13} m^2/s$  and  $d = 150 \mu m$ .

**Video S7.** Animations of the peptide diffusion in the biofilm layer over time for the control.  
 $D = 5 \times 10^{-13} m^2/s$  .

**Video S8.** Animations of the peptide diffusion in the biofilm layer over time for the microneedle patch.  $D = 5 \times 10^{-13} m^2/s$  and  $d = 300 \mu m$ .

**Video S9.** Animations of the peptide diffusion in the biofilm layer over time for the control.  
 $D = 1 \times 10^{-13} m^2/s$  .

**Video S10.** Animations of the peptide diffusion in the biofilm layer over time for the microneedle patch.  $D = 1 \times 10^{-13} m^2/s$  and  $d = 150 \mu m$ .

**Video S11.** Animations of the peptide diffusion in the biofilm layer over time for the control.  
 $D = 1 \times 10^{-13} m^2/s$  .

**Video S12.** Animations of the peptide diffusion in the biofilm layer over time for the microneedle patch.  $D = 1 \times 10^{-13} m^2/s$  and  $d = 300 \mu m$ .
